# Supplementary material for: Effect of Lymphatic Filariasis and Hookworm Infection on Pregnancy Course and Outcome in Women Living in the Democratic Republic of the Congo
Source: PubMed Central journal article supplement (PMC8176502; doi:10.4269/ajtmh.20-1422), 2021-05-03
Supplement: tpmd201422.SD1.pdf [file tpmd201422.SD1.pdf]

|                                                                                                                                                                                   |               |
|-----------------------------------------------------------------------------------------------------------------------------------------------------------------------------------|---------------|
| Are you in a regular relationship?                                                                                                                                                | Yes<br>No     |
| How long have you been in a regular relationship?                                                                                                                                 | ___ years     |
| Have you been a regular couple for more than 2 years?                                                                                                                             | Yes<br>No     |
| Have you ever given birth to a child?                                                                                                                                             | Yes<br>No     |
| How many sons are alive?<br>How many daughters are alive?                                                                                                                         | ____<br>_____ |
| How many boys have died and how many girls have died?                                                                                                                             | ____<br>_____ |
| How many boys have died in the month following the birth?<br>How many girls have died in the month following the birth?                                                           | ____<br>_____ |
| Are you currently pregnant?                                                                                                                                                       |               |
| Apart from pregnancies that resulted in live births, do you have another pregnancy that lasted only a few weeks or a few months, or that ended in the birth of a stillborn child? | Yes<br>No     |
| How many times has this happened?                                                                                                                                                 | _____         |
| How many times did this happen in the first quarter?                                                                                                                              | _____         |
| Age at first pregnancy                                                                                                                                                            | _____         |
| How many children were born at term (> 8 months)?                                                                                                                                 | _____         |
| How many children were born prematurely (< 8 months)?                                                                                                                             | _____         |
| Number of hemorrhages from delivery during childbirth?                                                                                                                            | _____         |
